# Supplementary material for: Medical students’ exposure to and attitudes towards product promotion and incentives from the pharmaceutical industry in 2019: a national cross-sectional study in France
Source: HighWire-hosted journal article supplement (doi:10.1136/bmjopen-2020-045671), 2022-07-01
Supplement: bmjopen-2020-045671supp001_data_supplement.pdf [file bmjopen-2020-045671supp001_data_supplement.pdf]

# Medical students' exposure to and attitudes towards product promotion and incentives from the pharmaceutical industry in 2019: A national cross-sectional study in France.

## Appendix: supplementary material

### Table of contents

|                                                                                                                                                   |           |
|---------------------------------------------------------------------------------------------------------------------------------------------------|-----------|
| <b>Table 1: Sociodemographic characteristics of the respondents, supplementary material.....</b>                                                  | <b>2</b>  |
| <b>Table 2: Sociodemographic characteristics of the respondents (raw data) and of all French medical students.....</b>                            | <b>3</b>  |
| <b>Table 3: Exposure of medical students to each type of pharmaceutical product promotion and incentives. ....</b>                                | <b>5</b>  |
| <b>Table 4: Appropriateness of gifts and promotional funding from the pharmaceutical industry according to students .....</b>                     | <b>10</b> |
| <b>Table 5: Students' scepticism about the influence of pharmaceutical product promotion and incentives. ....</b>                                 | <b>12</b> |
| <b>Table 6: multivariate linear model of the cumulative exposure score.....</b>                                                                   | <b>14</b> |
| <b>Table 7: Comparison between 2012 (data source: Etain et al.<sup>1</sup>) and 2019 (current study) of students' exposure and opinions. ....</b> | <b>15</b> |
| <b>Document 1: Questionnaire in French.....</b>                                                                                                   | <b>16</b> |

**Table 1: Sociodemographic characteristics of the respondents, supplementary material**

|                                                 | <b>All<br/>n = 6280</b> | <b>Clinical<br/>students<br/>n = 3549</b> | <b>Primary care<br/>residents<br/>n = 1335</b> | <b>Other residents<br/>n = 1396</b> |
|-------------------------------------------------|-------------------------|-------------------------------------------|------------------------------------------------|-------------------------------------|
| <b>Year of study (n, % post-stratification)</b> |                         |                                           |                                                |                                     |
| Year 4                                          | 1000 (14.8%)            | 1000 (33.9%)                              | -                                              | -                                   |
| Year 5                                          | 1217 (14.8%)            | 1217 (34.0%)                              | -                                              | -                                   |
| Year 6                                          | 1332 (14.0%)            | 1332 (32.1%)                              | -                                              | -                                   |
| Year 7                                          | 624 (14.4%)             | -                                         | 360 (33.0%)                                    | 264 (19.7%)                         |
| Year 8                                          | 677 (14.2%)             | -                                         | 367 (29.6%)                                    | 310 (21.7%)                         |
| Year 9                                          | 888 (14.0%)             | -                                         | 561 (32.8%)                                    | 327 (18.6%)                         |
| Year 10                                         | 386 (9.4%)              | -                                         | 27 (2.6%)                                      | 359 (27.8%)                         |
| Year 11                                         | 119 (3.7%)              | -                                         | 7 (1.0%)                                       | 112 (10.9%)                         |
| Year 12                                         | 37 (0.6%)               | -                                         | 13 (0.9%)                                      | 24 (1.3%)                           |
| <b>Region (n, % post-stratification)</b>        |                         |                                           |                                                |                                     |
| Ile-de-France                                   | 1021 (20.4%)            | 806 (22.9%)                               | 54 (9.9%)                                      | 161 (25.2%)                         |
| Auvergne-Rhône-Alpes                            | 848 (11.9%)             | 549 (12.1%)                               | 179 (16.7%)                                    | 120 (8.0%)                          |
| Grand-Est                                       | 678 (9.8%)              | 395 (10.8%)                               | 138 (11.9%)                                    | 145 (7.0%)                          |
| Hauts-de-France                                 | 432 (9.5%)              | 279 (10.2%)                               | 57 (7.7%)                                      | 96 (9.9%)                           |
| Nouvelle Aquitaine                              | 491 (7.9%)              | 208 (6.4%)                                | 141 (10.6%)                                    | 142 (7.7%)                          |
| Occitanie                                       | 359 (7.5%)              | 163 (6.5%)                                | 105 (6.4%)                                     | 91 (9.6%)                           |
| Provence-Alpes-Côte-d'Azur +<br>Corse           | 221 (6.6%)              | 89 (6.4%)                                 | 85 (9.2%)                                      | 47 (4.7%)                           |
| Pays-de-la-Loire                                | 687 (5.7%)              | 290 (5.9%)                                | 191 (5.4%)                                     | 206 (5.7%)                          |
| Normandie                                       | 336 (5.7%)              | 180 (5.3%)                                | 72 (6.6%)                                      | 84 (5.4%)                           |
| Bretagne                                        | 632 (5.2%)              | 350 (5.0%)                                | 160 (6.3%)                                     | 122 (4.5%)                          |
| Bourgogne-Franche-Comté                         | 288 (4.7%)              | 98 (4.3%)                                 | 76 (4.0%)                                      | 114 (5.9%)                          |
| Centre-Val de Loire                             | 157 (2.9%)              | 112 (3.3%)                                | 17 (1.6%)                                      | 28 (3.3%)                           |
| Antilles Guyane                                 | 64 (1.5%)               | 30 (0.9%)                                 | 15 (1.5%)                                      | 19 (2.2%)                           |
| Océan Indien                                    | 66 (0.8%)               | -                                         | 45 (2.1%)                                      | 21 (0.8%)                           |

**Table 2: Sociodemographic characteristics of the respondents (raw data) and of all French medical students (data source: French Ministry of higher education and scientific research, French national health professional demographic observatory).**

|                                                 | All                                    | Clinical students                      | Primary care residents                 | Other residents    |
|-------------------------------------------------|----------------------------------------|----------------------------------------|----------------------------------------|--------------------|
|                                                 | n (sample) = 6 280<br>n (all) = 60 550 | n (sample) = 3 549<br>n (all) = 25 903 | n (sample) = 1 335<br>n (all) = 34 647 | n (sample) = 1 396 |
| <b>Age in years</b> (mean ± SD if available)    |                                        |                                        |                                        |                    |
| Study sample                                    | 25.8 ± 3.2                             | 24.2 ± 2.6                             | 27.9 ± 2.8                             | 28.0 ± 2.6         |
| All                                             | 24.5                                   | 23.3                                   |                                        | 27.2               |
| <b>Gender</b> (n, raw %)                        |                                        |                                        |                                        |                    |
| <b>Male</b>                                     |                                        |                                        |                                        |                    |
| Study sample                                    | 2 214 (35.3%)                          | 1 259 (35.5%)                          | 405 (30.3%)                            | 550 (39.4%)        |
| All                                             | 25 437 (42.1%)                         | 10 599 (41.0%)                         |                                        | 14 838 (42.8%)     |
| <b>Female</b>                                   |                                        |                                        |                                        |                    |
| Study sample                                    | 4 066 (64.7%)                          | 2 290 (64.5%)                          | 930 (69.7%)                            | 846 (60.6%)        |
| All                                             | 35 113 (57.9%)                         | 15 304 (59.0%)                         |                                        | 19 809 (57.2%)     |
| <b>Year of study</b> (n, raw %)                 |                                        |                                        |                                        |                    |
| <b>Year 4</b>                                   |                                        |                                        |                                        |                    |
| Study sample                                    | 1 000 (15.9%)                          | 1 000 (28.2%)                          | -                                      | -                  |
| All                                             | 8 767 (14.5%)                          | 8 767 (33.8%)                          | -                                      | -                  |
| <b>Year 5</b>                                   |                                        |                                        |                                        |                    |
| Study sample                                    | 1 217 (19.4%)                          | 1 217 (34.3%)                          | -                                      | -                  |
| All                                             | 8 525 (14.1%)                          | 8 525 (32.9%)                          | -                                      | -                  |
| <b>Year 6</b>                                   |                                        |                                        |                                        |                    |
| Study sample                                    | 1 332 (21.2%)                          | 1 332 (37.5%)                          | -                                      | -                  |
| All                                             | 8 611 (14.2%)                          | 8 611 (33.2%)                          | -                                      | -                  |
| <b>Year 7</b>                                   |                                        |                                        |                                        |                    |
| Study sample                                    | 624 (9.9%)                             | -                                      | 360 (27.0%)                            | 264 (18.9%)        |
| All                                             | 8 868 (14.6%)                          | -                                      |                                        | 8 868 (25.6%)      |
| <b>Year 8</b>                                   |                                        |                                        |                                        |                    |
| Study sample                                    | 677 (10.8%)                            | -                                      | 367 (27.5%)                            | 310 (22.2%)        |
| All                                             | 7 465 (12.3%)                          | -                                      |                                        | 7 465 (21.5%)      |
| <b>Year 9</b>                                   |                                        |                                        |                                        |                    |
| Study sample                                    | 888 (14.1%)                            | -                                      | 561 (42.0%)                            | 327 (23.4%)        |
| All                                             | 10 849 (17.9%)                         | -                                      |                                        | 10 849 (31.3%)     |
| <b>Year 10</b>                                  |                                        |                                        |                                        |                    |
| Study sample                                    | 386 (6.1%)                             | -                                      | 27 (2.0%)                              | 359 (25.7%)        |
| All                                             | 5 180 (8.6%)                           | -                                      |                                        | 5 180 (14.9%)      |
| <b>Year 11</b>                                  |                                        |                                        |                                        |                    |
| Study sample                                    | 119 (1.9%)                             | -                                      | 7 (0.5%)                               | 112 (8.0%)         |
| All                                             | 2 285 (3.8%)                           | -                                      |                                        | 2 285 (6.6%)       |
| <b>Year 12</b>                                  |                                        |                                        |                                        |                    |
| Study sample                                    | 37 (0.6%)                              | -                                      | 13 (1.0%)                              | 24 (1.7%)          |
| All                                             | ?                                      | -                                      |                                        | ?                  |
| <b>Medical School</b> , study sample (n, raw %) |                                        |                                        |                                        |                    |
| Paris                                           | 1 021 (16.3%)                          | 806 (22.7%)                            | 54 (4.0%)                              | 161 (11.5%)        |
| Rennes                                          | 445 (7.1%)                             | 251 (7.1%)                             | 109 (8.2%)                             | 85 (6.1%)          |
| Angers                                          | 417 (6.6%)                             | 180 (5.1%)                             | 141 (10.6%)                            | 96 (6.9%)          |
| Nancy                                           | 349 (5.6%)                             | 260 (7.3%)                             | 62 (4.6%)                              | 27 (1.9%)          |

|                                        | All          | Clinical students | Primary care residents | Other residents |
|----------------------------------------|--------------|-------------------|------------------------|-----------------|
| Bordeaux                               | 303 (4.8%)   | 137 (3.9%)        | 85 (6.4%)              | 81 (5.8%)       |
| Grenoble                               | 272 (4.3%)   | 194 (5.5%)        | 68 (5.1%)              | 10 (0.7%)       |
| Nantes                                 | 270 (4.3%)   | 110 (3.1%)        | 50 (3.7%)              | 110 (7.9%)      |
| Amiens                                 | 263 (4.2%)   | 209 (5.9%)        | 7 (0.5%)               | 47 (3.4%)       |
| Lyon                                   | 222 (3.5%)   | 149 (4.2%)        | 52 (3.9%)              | 21 (1.5%)       |
| Besançon                               | 201 (3.2%)   | 93 (2.6%)         | 53 (4.0%)              | 55 (3.9%)       |
| Montpellier                            | 195 (3.1%)   | 55 (1.5%)         | 103 (7.7%)             | 37 (2.7%)       |
| Reims                                  | 195 (3.1%)   | 52 (1.5%)         | 36 (2.7%)              | 107 (7.7%)      |
| Brest                                  | 187 (3.0%)   | 99 (2.8%)         | 51 (3.8%)              | 37 (2.7%)       |
| Clermont-Ferrand                       | 186 (3.0%)   | 112 (3.2%)        | 31 (2.3%)              | 43 (3.1%)       |
| Caen                                   | 175 (2.8%)   | 86 (2.4%)         | 34 (2.5%)              | 55 (3.9%)       |
| Lille                                  | 169 (2.7%)   | 70 (2.0%)         | 50 (3.7%)              | 49 (3.5%)       |
| Saint-Etienne                          | 168 (2.7%)   | 94 (2.6%)         | 28 (2.1%)              | 46 (3.3%)       |
| Toulouse                               | 164 (2.6%)   | 108 (3.0%)        | 2 (0.1%)               | 54 (3.9%)       |
| Rouen                                  | 161 (2.6%)   | 94 (2.6%)         | 38 (2.8%)              | 29 (2.1%)       |
| Tours                                  | 157 (2.5%)   | 112 (3.2%)        | 17 (1.3%)              | 28 (2.0%)       |
| Limoges                                | 150 (2.4%)   | 71 (2.0%)         | 27 (2.0%)              | 52 (3.7%)       |
| Strasbourg                             | 134 (2.1%)   | 83 (2.3%)         | 40 (3.0%)              | 11 (0.8%)       |
| Nice                                   | 113 (1.8%)   | 30 (0.8%)         | 55 (4.1%)              | 28 (2.0%)       |
| Aix-Marseille                          | 108 (1.7%)   | 59 (1.7%)         | 30 (2.2%)              | 19 (1.4%)       |
| Dijon                                  | 87 (1.4%)    | 5 (0.1%)          | 23 (1.7%)              | 59 (4.2%)       |
| La Réunion/Indian Ocean                | 66 (1.1%)    | -                 | 45 (3.4%)              | 21 (1.5%)       |
| Antilles-Guyane                        | 64 (1.0%)    | 30 (0.8%)         | 15 (1.1%)              | 19 (1.4%)       |
| Poitiers                               | 38 (0.6%)    | 0 (0.0%)          | 29 (2.2%)              | 9 (0.6%)        |
| <b>Region, study sample (n, raw %)</b> |              |                   |                        |                 |
| Ile-de-France                          | 1021 (16.3%) | 806 (22.7%)       | 54 (4.0%)              | 161 (11.5%)     |
| Auvergne-Rhône-Alpes                   | 848 (13.5%)  | 549 (15.5%)       | 179 (13.4%)            | 120 (8.6%)      |
| Pays-de-la-Loire                       | 687 (10.9%)  | 290 (8.2%)        | 191 (14.3%)            | 206 (14.8%)     |
| Grand-Est                              | 678 (10.8%)  | 395 (11.1%)       | 138 (10.3%)            | 145 (10.4%)     |
| Bretagne                               | 632 (10.1%)  | 350 (9.9%)        | 160 (12.0%)            | 122 (8.7%)      |
| Nouvelle Aquitaine                     | 491 (7.8%)   | 208 (5.9%)        | 141 (10.6%)            | 142 (10.2%)     |
| Hauts-de-France                        | 432 (6.9%)   | 279 (7.9%)        | 57 (4.3%)              | 96 (6.9%)       |
| Occitanie                              | 359 (5.7%)   | 163 (4.6%)        | 105 (7.9%)             | 91 (6.5%)       |
| Normandie                              | 336 (5.4%)   | 180 (5.1%)        | 72 (5.4%)              | 84 (6.0%)       |
| Bourgogne-Franche-Comté                | 288 (4.6%)   | 98 (2.8%)         | 76 (5.7%)              | 114 (8.2%)      |
| Provence-Alpes-Côte-d'Azur + Corse     | 221 (3.5%)   | 89 (2.5%)         | 85 (6.4%)              | 47 (3.4%)       |
| Centre-Val de Loire                    | 157 (2.5%)   | 112 (3.2%)        | 17 (1.3%)              | 28 (2.0%)       |
| Indian Ocean                           | 66 (1.1%)    | -                 | 45 (3.4%)              | 21 (1.5%)       |
| Antilles Guyane                        | 64 (1.0%)    | 30 (0.8%)         | 15 (1.1%)              | 19 (1.4%)       |

**Table 3: Exposure of medical students to each type of pharmaceutical product promotion and incentives. Each student was asked to assess the frequency of exposure to each of the situations presented.**

| Situations<br>(n, % post-stratification, 99% CI)                                 | All<br>n = 6280                  | Clinical<br>students<br>n = 3549 | Primary care<br>residents<br>n = 1335 | Other<br>residents<br>n = 1396  | P value          |
|----------------------------------------------------------------------------------|----------------------------------|----------------------------------|---------------------------------------|---------------------------------|------------------|
| <b>Meeting with a pharmaceutical representative (since beginning of studies)</b> |                                  |                                  |                                       |                                 | <b>&lt; .001</b> |
| Never                                                                            | 1140 (14.6%)<br>(14.2% to 15.0%) | 1038 (29.0%)<br>(28.3% to 29.7%) | 37 (2.5%)<br>(2.1% to 2.8%)           | 65 (4.3%)<br>(3.9% to 4.7%)     |                  |
| Once to 5 times                                                                  | 2859 (42.8%)<br>(42.2% to 43.3%) | 2038 (58.0%)<br>(57.2% to 58.8%) | 408 (33.3%)<br>(32.3% to 34.3%)       | 413 (29.1%)<br>(28.2% to 30.0%) |                  |
| 6 to 10 times                                                                    | 1053 (17.1%)<br>(16.7% to 17.5%) | 344 (9.3%)<br>(8.8% to 9.7%)     | 392 (26.9%)<br>(25.9% to 27.9%)       | 317 (20.4%)<br>(19.6% to 21.1%) |                  |
| More than 10 times                                                               | 1228 (25.5%)<br>(25.0% to 26.0%) | 129 (3.7%)<br>(3.4% to 4.1%)     | 498 (37.4%)<br>(36.3% to 38.4%)       | 601 (46.2%)<br>(45.3% to 47.2%) |                  |
| <b>Meeting with a pharmaceutical representative (within the last six months)</b> |                                  |                                  |                                       |                                 | <b>&lt; .001</b> |
| Never                                                                            | 2735 (37.6%)<br>(37.1% to 38.2%) | 2119 (58.2%)<br>(57.4% to 59.0%) | 291 (19.6%)<br>(18.7% to 20.4%)       | 325 (23.4%)<br>(22.6% to 24.2%) |                  |
| Once to 5 times                                                                  | 2957 (49.9%)<br>(49.4% to 50.5%) | 1372 (40.3%)<br>(39.5% to 41.1%) | 807 (61.5%)<br>(60.4% to 62.5%)       | 778 (54.2%)<br>(53.3% to 55.2%) |                  |
| 6 to 10 times                                                                    | 376 (7.9%)<br>(7.7% to 8.2%)     | 43 (1.2%)<br>(1.0% to 1.4%)      | 164 (13.1%)<br>(12.4% - 13.9%)        | 169 (13.2%)<br>(12.5% to 13.8%) |                  |
| More than 10 times                                                               | 212 (4.5%)<br>(4.3% to 4.7%)     | 15 (0.3%)<br>(0.2% to 0.4%)      | 73 (5.8%)<br>(5.3% to 6.3%)           | 124 (9.2%)<br>(8.7% to 9.8%)    |                  |
| <b>Drug presentation card from a PR (since beginning of studies)</b>             |                                  |                                  |                                       |                                 | <b>&lt; .001</b> |
| Never                                                                            | 1246 (16.3%)<br>(15.9% to 16.7%) | 1141 (31.5%)<br>(30.7% to 32.3%) | 30 (2.3%)<br>(2.0% - 2.6%)            | 75 (6.2%)<br>(5.7% to 6.6%)     |                  |
| Once to 5 times                                                                  | 2850 (42.1%)<br>(41.6% to 42.6%) | 1928 (54.4%)<br>(53.5% to 55.2%) | 432 (33.1%)<br>(32.1% to 34.1%)       | 490 (32.2%)<br>(31.3% to 33.1%) |                  |
| 6 to 10 times                                                                    | 1015 (18.0%)<br>(17.5% to 18.4%) | 346 (10.4%)<br>(9.9% to 10.9%)   | 366 (26.1%)<br>(25.2% to 27.1%)       | 303 (22.0%)<br>(21.3% to 22.8%) |                  |
| More than 10 times                                                               | 1169 (23.7%)<br>(23.2% to 24.1%) | 134 (3.8%)<br>(3.5% to 4.1%)     | 507 (38.4%)<br>(37.4% to 39.5%)       | 528 (39.6%)<br>(38.7% to 40.5%) |                  |
| <b>Drug presentation card from a PR (within the last six months)</b>             |                                  |                                  |                                       |                                 | <b>&lt; .001</b> |
| Never                                                                            | 2874 (40.0%)<br>(39.5% to 40.5%) | 2182 (60.1%)<br>(59.3% to 60.9%) | 305 (20.2%)<br>(19.3% to 21.1%)       | 387 (27.6%)<br>(26.8% to 28.5%) |                  |
| Once to 5 times                                                                  | 2752 (47.1%)<br>(46.6% to 47.7%) | 1264 (37.1%)<br>(36.3% to 37.9%) | 737 (56.4%)<br>(55.3% to 57.5%)       | 751 (53.8%)<br>(52.9% to 54.8%) |                  |
| 6 to 10 times                                                                    | 428 (8.3%)<br>(8.0% to 8.6%)     | 78 (2.0%)<br>(1.8% to 2.2%)      | 182 (14.4%)<br>(13.7% to 15.2%)       | 168 (12.3%)<br>(11.7% to 13.0%) |                  |
| More than 10 times                                                               | 226 (4.5%)<br>(4.3% to 4.8%)     | 25 (0.8%)<br>(0.6% to 0.9%)      | 111 (9.0%)<br>(8.4% to 9.6%)          | 90 (6.2%)<br>(5.8% to 6.7%)     |                  |

| Situations<br>(n, % post-stratification, 99% CI)                                 | All<br>n = 6280                  | Clinical<br>students<br>n = 3549 | Primary care<br>residents<br>n = 1335 | Other<br>residents<br>n = 1396  | P value          |
|----------------------------------------------------------------------------------|----------------------------------|----------------------------------|---------------------------------------|---------------------------------|------------------|
| <b>Reception of advertising gift with low value (since beginning of studies)</b> |                                  |                                  |                                       |                                 | <b>&lt; .001</b> |
| Never                                                                            | 1506 (21.9%)<br>(21.4% to 22.3%) | 1068 (30.6%)<br>(29.9% to 31.4%) | 196 (14.8%)<br>(14.0% to 15.6%)       | 242 (15.3%)<br>(14.6% to 16.0%) |                  |
| Once to 5 times                                                                  | 3163 (48.2%)<br>(47.7% to 48.7%) | 1926 (54.1%)<br>(53.3% to 54.9%) | 630 (45.8%)<br>(44.7% to 46.8%)       | 607 (42.0%)<br>(41.0% to 42.9%) |                  |
| 6 to 10 times                                                                    | 944 (16.8%)<br>(16.4% to 17.2%)  | 385 (10.6%)<br>(10.1% to 11.1%)  | 285 (22.2%)<br>(21.3% to 23.1%)       | 274 (21.1%)<br>(20.3% to 21.8%) |                  |
| More than 10 times                                                               | 667 (13.2%)<br>(12.8% to 13.6%)  | 170 (4.7%)<br>(4.4% to 5.1%)     | 224 (17.2%)<br>(16.4% to 18.1%)       | 273 (21.7%)<br>(20.9% to 22.5%) |                  |
| <b>Reception of advertising gift with low value (within the last six months)</b> |                                  |                                  |                                       |                                 | <b>&lt; .001</b> |
| Never                                                                            | 3564 (53.5%)<br>(52.9% to 54.0%) | 2280 (63.9%)<br>(63.2% to 64.7%) | 627 (44.9%)<br>(43.8% to 46.0%)       | 657 (45.7%)<br>(44.8% to 46.7%) |                  |
| Once to 5 times                                                                  | 2457 (41.3%)<br>(40.8% to 41.8%) | 1208 (34.1%)<br>(33.3% to 34.9%) | 616 (47.7%)<br>(46.6% to 48.7%)       | 633 (46.3%)<br>(45.3% to 47.3%) |                  |
| 6 to 10 times                                                                    | 184 (3.7%)<br>(3.5% to 3.9%)     | 43 (1.5%)<br>(1.3% to 1.7%)      | 67 (5.3%)<br>(4.9% to 5.8%)           | 74 (5.5%)<br>(5.1% to 6.0%)     |                  |
| More than 10 times                                                               | 75 (1.5%)<br>(1.4% to 1.6%)      | 18 (0.5%)<br>(0.4% to 0.6%)      | 25 (2.1%)<br>(1.8% to 2.4%)           | 32 (2.4%)<br>(2.2% to 2.7%)     |                  |
| <b>Meal offered by drug company (since beginning of studies)</b>                 |                                  |                                  |                                       |                                 | <b>&lt; .001</b> |
| Never                                                                            | 2001 (26.3%)<br>(25.9% to 26.8%) | 1662 (44.9%)<br>(44.1% to 45.7%) | 213 (15.7%)<br>(14.9% to 16.5%)       | 126 (9.0%)<br>(8.5% to 9.6%)    |                  |
| Once to 5 times                                                                  | 3091 (48.9%)<br>(48.3% to 49.4%) | 1667 (48.2%)<br>(47.4% to 49.1%) | 806 (58.6%)<br>(57.5% to 59.6%)       | 618 (42.1%)<br>(41.2% to 43.1%) |                  |
| 6 to 10 times                                                                    | 675 (12.4%)<br>(12.1% to 12.8%)  | 168 (4.9%)<br>(4.5% to 5.2%)     | 205 (16.1%)<br>(15.4% to 17.0%)       | 302 (19.9%)<br>(19.1% to 20.7%) |                  |
| More than 10 times                                                               | 513 (12.4%)<br>(12.0% to 12.7%)  | 52 (2.0%)<br>(1.7% to 2.2%)      | 111 (9.6%)<br>(8.9% to 10.2%)         | 350 (29.0%)<br>(28.1% to 29.8%) |                  |
| <b>Meal offered by drug company (within the last six months)</b>                 |                                  |                                  |                                       |                                 | <b>&lt; .001</b> |
| Never                                                                            | 3924 (56.6%)<br>(56.1% to 57.1%) | 2673 (74.1%)<br>(73.4% to 74.8%) | 779 (55.2%)<br>(54.2% to 56.3%)       | 472 (33.6%)<br>(32.7% to 34.5%) |                  |
| Once to 5 times                                                                  | 2162 (38.8%)<br>(38.3% to 39.3%) | 850 (24.9%)<br>(24.2% to 25.7%)  | 521 (41.4%)<br>(40.3% to 42.4%)       | 791 (55.9%)<br>(54.9% to 56.8%) |                  |
| 6 to 10 times                                                                    | 139 (3.1%)<br>(3.0% to 3.3%)     | 22 (0.9%)<br>(0.7% to 1.0%)      | 26 (2.6%)<br>(2.3% to 3.0%)           | 91 (6.6%)<br>(6.2% to 7.1%)     |                  |
| More than 10 times                                                               | 55 (1.5%)<br>(1.3% to 1.6%)      | 4 (0.1%)<br>(0.1% to 0.2%)       | 9 (0.8%)<br>(0.6% to 1.0%)            | 42 (3.9%)<br>(3.6% to 4.3%)     |                  |
| <b>Grand rounds sponsored by drug company (since beginning of studies)</b>       |                                  |                                  |                                       |                                 | <b>&lt; .001</b> |
| Never                                                                            | 4033 (56.8%)<br>(56.2% to 57.3%) | 3254 (92.1%)<br>(91.7% to 92.6%) | 540 (44.0%)<br>(43.0% to 45.1%)       | 239 (17.9%)<br>(17.2% to 18.6%) |                  |
| Once to 5 times                                                                  | 1764 (32.7%)<br>(32.2% to 33.2%) | 284 (7.6%)<br>(7.1% to 8.0%)     | 720 (51.4%)<br>(50.3% to 52.4%)       | 760 (52.7%)<br>(51.7% to 53.7%) |                  |
| 6 to 10 times                                                                    | 292 (5.7%)<br>(5.4% to 5.9%)     | 8 (0.2%)<br>(0.1% to 0.3%)       | 59 (3.5%)<br>(3.1% to 3.9%)           | 225 (14.9%)<br>(14.2% to 15.6%) |                  |
| More than 10 times                                                               | 191 (4.9%)<br>(4.7% to 5.1%)     | 3 (0.1%)<br>(0.0% to 0.2%)       | 16 (1.1%)<br>(0.9% to 1.3%)           | 172 (14.5%)<br>(13.8% to 15.2%) |                  |

| Situations<br>(n, % post-stratification, 99% CI)                                    | All<br>n = 6280                  | Clinical<br>students<br>n = 3549 | Primary care<br>residents<br>n = 1335 | Other<br>residents<br>n = 1396   | P value |
|-------------------------------------------------------------------------------------|----------------------------------|----------------------------------|---------------------------------------|----------------------------------|---------|
| Grand rounds sponsored by drug company ( <u>within the last six months</u> )        |                                  |                                  |                                       |                                  | < .001  |
| Never                                                                               | 4969 (73.3%)<br>(72.9% to 73.8%) | 3447 (96.8%)<br>(96.5% to 97.1%) | 958 (72.5%)<br>(71.5% to 73.5%)       | 564 (41.6%)<br>(40.6% to 42.5%)  |         |
| Once to 5 times                                                                     | 1267 (25.7%)<br>(25.3% to 26.2%) | 100 (3.1%)<br>(2.8% to 3.4%)     | 370 (26.9%)<br>(25.9% to 27.9%)       | 797 (56.1%)<br>(55.1% to 57.0%)  |         |
| 6 to 10 times                                                                       | 32 (0.6%)<br>(0.6% to 0.7%)      | 1 (0.0%)<br>(0.0% to 0.1%)       | 5 (0.4%)<br>(0.3% to 0.6%)            | 26 (1.7%)<br>(1.4% to 1.9%)      |         |
| More than 10 times                                                                  | 12 (0.3%)<br>(0.2% to 0.3%)      | 1 (0.0%)<br>(0.0% to 0.1%)       | 2 (0.2%)<br>(0.1% to 0.3%)            | 9 (0.7%)<br>(0.5% to 0.9%)       |         |
| Reception of advertising gift with high value ( <u>since beginning of studies</u> ) |                                  |                                  |                                       |                                  | < .001  |
| Never                                                                               | 4210 (66.0%)<br>(65.5% to 66.5%) | 2542 (72.7%)<br>(71.9% to 73.4%) | 700 (52.7%)<br>(51.6% to 53.8%)       | 968 (67.2%)<br>(66.3% to 68.1%)  |         |
| Once to 5 times                                                                     | 1931 (31.5%)<br>(31.0% to 32.0%) | 963 (26.1%)<br>(25.4% to 26.9%)  | 578 (42.8%)<br>(41.7% to 43.9%)       | 390 (30.0%)<br>(29.1% to 30.8%)  |         |
| 6 to 10 times                                                                       | 101 (1.8%)<br>(1.7% to 2.0%)     | 38 (1.0%)<br>(0.8% to 1.2%)      | 42 (3.5%)<br>(3.1% to 3.9%)           | 21 (1.6%)<br>(1.4% to 1.9%)      |         |
| More than 10 times                                                                  | 38 (0.7%)<br>(0.6% to 0.8%)      | 6 (0.2%)<br>(0.2% to 0.3%)       | 15 (1.0%)<br>(0.8% to 1.3%)           | 17 (1.2%)<br>(1.0% to 1.4%)      |         |
| Reception of advertising gift with high value ( <u>within the last six months</u> ) |                                  |                                  |                                       |                                  | < .001  |
| Never                                                                               | 5549 (87.9%)<br>(87.5% to 88.2%) | 3194 (89.9%)<br>(89.4% to 90.3%) | 1106 (82.6%)<br>(81.7% to 83.4%)      | 1249 (89.3%)<br>(88.7% to 89.9%) |         |
| Once to 5 times                                                                     | 705 (11.6%)<br>(11.3% to 12.0%)  | 346 (9.9%)<br>(9.4% to 10.4%)    | 218 (16.6%)<br>(15.8% to 17.4%)       | 141 (10.1%)<br>(9.6% to 10.7%)   |         |
| 6 to 10 times                                                                       | 18 (0.3%)<br>(0.3% to 0.4%)      | 5 (0.1%)<br>(0.1% to 0.2%)       | 8 (0.6%)<br>(0.5% to 0.8%)            | 5 (0.5%)<br>(0.4% to 0.6%)       |         |
| More than 10 times                                                                  | 8 (0.1%)<br>(0.1% to 0.2%)       | 4 (0.2%)<br>(0.1% to 0.2%)       | 3 (0.2%)<br>(0.1% to 0.3%)            | 1 (0.0%)<br>(0.0% to 0.1%)       |         |
| Free medical demonstration device ( <u>since beginning of studies</u> )             |                                  |                                  |                                       |                                  | < 0.001 |
| Never                                                                               | 4631 (70.9%)<br>(70.4% to 71.4%) | 3019 (85.4%)<br>(84.9% to 86.0%) | 696 (52.6%)<br>(51.5% to 53.7%)       | 916 (65.2%)<br>(64.3% to 66.1%)  |         |
| Once to 5 times                                                                     | 1526 (26.6%)<br>(26.1% to 27.1%) | 519 (14.4%)<br>(13.8% to 15.0%)  | 594 (43.8%)<br>(42.7% to 44.9%)       | 413 (30.0%)<br>(29.2% to 30.9%)  |         |
| 6 to 10 times                                                                       | 86 (1.6%)<br>(1.4% to 1.7%)      | 9 (0.1%)<br>(0.1% to 0.2%)       | 37 (2.9%)<br>(2.5% to 3.3%)           | 40 (2.6%)<br>(2.3% to 2.9%)      |         |
| More than 10 times                                                                  | 37 (0.9%)<br>(0.8% to 1.0%)      | 2 (0.0%)<br>(0.0% to 0.1%)       | 8 (0.7%)<br>(0.5% to 0.9%)            | 27 (2.2%)<br>(1.9% to 2.5%)      |         |

| Situations<br>(n, % post-stratification, 99% CI)                                  | All<br>n = 6280                  | Clinical students<br>n = 3549    | Primary care residents<br>n = 1335 | Other residents<br>n = 1396      | P value          |
|-----------------------------------------------------------------------------------|----------------------------------|----------------------------------|------------------------------------|----------------------------------|------------------|
| <b>Free medical demonstration device (within the last six months)</b>             |                                  |                                  |                                    |                                  | <b>&lt; .001</b> |
| Never                                                                             | 5457 (84.7%)<br>(84.3% to 85.1%) | 3333 (94.0%)<br>(93.6% to 94.4%) | 985 (72.7%)<br>(71.7% to 73.7%)    | 1139 (81.3%)<br>(80.6% to 82.1%) |                  |
| Once to 5 times                                                                   | 791 (14.5%)<br>(14.1% to 14.9%)  | 212 (5.9%)<br>(5.5% to 6.3%)     | 343 (26.7%)<br>(25.7% to 27.7%)    | 236 (16.9%)<br>(16.2% to 17.7%)  |                  |
| 6 to 10 times                                                                     | 17 (0.5%)<br>(0.4% to 0.5%)      | 2 (0.0%)<br>(0.0% to 0.1%)       | 5 (0.5%)<br>(0.3% to 0.6%)         | 10 (1.1%)<br>(0.9% to 1.3%)      |                  |
| More than 10 times                                                                | 15 (0.3%)<br>(0.2% to 0.3%)      | 2 (0.1%)<br>(0.0% to 0.1%)       | 2 (0.1%)<br>(0.1% to 0.2%)         | 11 (0.7%)<br>(0.5% to 0.9%)      |                  |
| <b>Free drug sample (since beginning of studies)</b>                              |                                  |                                  |                                    |                                  | <b>&lt; .001</b> |
| Never                                                                             | 4930 (76.8%)<br>(76.3% to 77.3%) | 3052 (86.4%)<br>(85.9% to 87.0%) | 800 (61.1%)<br>(60.1% to 62.2%)    | 1078 (75.7%)<br>(74.9% to 76.6%) |                  |
| Once to 5 times                                                                   | 1142 (18.8%)<br>(18.4% to 19.2%) | 473 (12.9%)<br>(12.4% to 13.5%)  | 451 (31.9%)<br>(30.9% to 32.9%)    | 218 (16.6%)<br>(15.9% to 17.3%)  |                  |
| 6 to 10 times                                                                     | 121 (2.5%)<br>(2.3% to 2.6%)     | 20 (0.5%)<br>(0.4% to 0.6%)      | 65 (5.6%)<br>(5.1% to 6.1%)        | 36 (2.7%)<br>(2.4% to 3.0%)      |                  |
| More than 10 times                                                                | 87 (2.0%)<br>(1.8% to 2.1%)      | 4 (0.1%)<br>(0.1% to 0.2%)       | 19 (1.4%)<br>(1.1% to 1.6%)        | 64 (5.0%)<br>(4.6% to 5.4%)      |                  |
| <b>Free drug sample (within the last six months)</b>                              |                                  |                                  |                                    |                                  | <b>&lt; .001</b> |
| Never                                                                             | 5566 (87.0%)<br>(86.6% to 87.4%) | 3327 (94.0%)<br>(93.6% to 94.4%) | 1032 (76.4%)<br>(75.4% to 77.3%)   | 1207 (85.6%)<br>(84.9% to 86.3%) |                  |
| Once to 5 times                                                                   | 641 (11.5%)<br>(11.1% to 11.8%)  | 213 (5.8%)<br>(5.4% to 6.1%)     | 281 (21.7%)<br>(20.8% to 22.6%)    | 147 (11.4%)<br>(10.8% to 12.1%)  |                  |
| 6 to 10 times                                                                     | 46 (0.9%)<br>(0.8% to 1.0%)      | 6 (0.2%)<br>(0.1% to 0.3%)       | 18 (1.6%)<br>(1.4% to 1.9%)        | 22 (1.3%)<br>(1.1% to 1.6%)      |                  |
| More than 10 times                                                                | 27 (0.6%)<br>(0.5% to 0.7%)      | 3 (0.1%)<br>(0.0% to 0.1%)       | 4 (0.3%)<br>(0.2% to 0.5%)         | 20 (1.6%)<br>(1.4% to 1.9%)      |                  |
| <b>Funding to attend conferences or grand rounds (since beginning of studies)</b> |                                  |                                  |                                    |                                  | <b>&lt; .001</b> |
| Never                                                                             | 5541 (84.4%)<br>(84.0% to 84.7%) | 3473 (97.9%)<br>(97.6% to 98.1%) | 1228 (91.8%)<br>(91.2% to 92.3%)   | 840 (60.0%)<br>(59.0% to 60.9%)  |                  |
| Once to 5 times                                                                   | 661 (13.9%)<br>(13.6% to 14.3%)  | 68 (2.0%)<br>(1.8% to 2.2%)      | 101 (7.8%)<br>(7.2% to 8.4%)       | 492 (35.2%)<br>(34.2% to 36.1%)  |                  |
| 6 to 10 times                                                                     | 60 (1.4%)<br>(1.3% to 1.5%)      | 5 (0.1%)<br>(0.0% to 0.1%)       | 5 (0.4%)<br>(0.3% to 0.5%)         | 50 (4.0%)<br>(3.6% to 4.4%)      |                  |
| More than 10 times                                                                | 18 (0.3%)<br>(0.3% to 0.4%)      | 3 (0.1%)<br>(0.1% to 0.2%)       | 1 (0.1%)<br>(0.0% to 0.2%)         | 14 (0.9%)<br>(0.7% to 1.1%)      |                  |
| <b>Funding to attend conferences or grand rounds (within the last six months)</b> |                                  |                                  |                                    |                                  | <b>&lt; .001</b> |
| Never                                                                             | 5817 (90.2%)<br>(89.9% to 90.6%) | 3524 (99.3%)<br>(99.2% to 99.5%) | 1275 (95.4%)<br>(94.9% to 95.8%)   | 1018 (73.7%)<br>(72.8% to 74.5%) |                  |
| Once to 5 times                                                                   | 451 (9.5%)<br>(9.2% to 9.8%)     | 23 (0.6%)<br>(0.5% to 0.7%)      | 56 (4.3%)<br>(3.9% to 4.7%)        | 372 (25.9%)<br>(25.1% to 26.7%)  |                  |
| 6 to 10 times                                                                     | 8 (0.2%)<br>(0.2% to 0.2%)       | 0                                | 3 (0.3%)<br>(0.2% to 0.4%)         | 5 (0.4%)<br>(0.3% to 0.6%)       |                  |
| More than 10 times                                                                | 4 (0.1%)<br>(0.0% to 0.1%)       | 2 (0.1%)<br>(0.0% to 0.1%)       | 1 (0.1%)<br>(0.0% to 0.2%)         | 1 (0.0%)<br>(0.0% to 0.1%)       |                  |



| Situations<br>(n, % post-stratification, 99% CI)                                           | All<br>n = 6280                  | Clinical<br>students<br>n = 3549 | Primary care<br>residents<br>n = 1335 | Other<br>residents<br>n = 1396   | P value |
|--------------------------------------------------------------------------------------------|----------------------------------|----------------------------------|---------------------------------------|----------------------------------|---------|
| Medical journal subscription offered by drug company ( <u>since beginning of studies</u> ) |                                  |                                  |                                       |                                  | < .001  |
| Never                                                                                      | 6089 (96.6%)<br>(96.4% to 96.8%) | 3467 (97.5%)<br>(97.3% to 97.8%) | 1271 (95.2%)<br>(94.7% to 95.7%)      | 1351 (96.4%)<br>(96.1% to 96.8%) |         |
| Once to 5 times                                                                            | 181 (3.2%)<br>(3.0% to 3.4%)     | 76 (2.3%)<br>(2.0% to 2.5%)      | 62 (4.6%)<br>(4.1% to 5.0%)           | 43 (3.3%)<br>(3.0% to 3.7%)      |         |
| 6 to 10 times                                                                              | 5 (0.1%)<br>(0.1% to 0.2%)       | 2 (0.1%)<br>(0.0% to 0.1%)       | 1 (0.0%)<br>(0.0% to 0.1%)            | 2 (0.2%)<br>(0.2% to 0.4%)       |         |
| More than 10 times                                                                         | 5 (0.1%)<br>(0.1% to 0.1%)       | 4 (0.1%)<br>(0.1% to 0.2%)       | 1 (0.2%)<br>(0.1% to 0.3%)            | 0                                |         |
| Medical journal subscription offered by drug company ( <u>within the last six months</u> ) |                                  |                                  |                                       |                                  | < .001  |
| Never                                                                                      | 6168 (98.2%)<br>(98.0% to 98.3%) | 3503 (98.6%)<br>(98.4% to 98.8%) | 1292 (96.6%)<br>(96.2% to 97.0%)      | 1373 (98.8%)<br>(98.6% to 99.0%) |         |
| Once to 5 times                                                                            | 104 (1.7%)<br>(1.6% to 1.9%)     | 41 (1.3%)<br>(1.1% to 1.5%)      | 40 (3.2%)<br>(2.9% to 3.6%)           | 23 (1.2%)<br>(1.0% to 1.4%)      |         |
| 6 to 10 times                                                                              | 6 (0.1%)<br>(0.0% to 0.1%)       | 3 (0.1%)<br>(0.0% to 0.1%)       | 3 (0.2%)<br>(0.1% to 0.3%)            | 0                                |         |
| More than 10 times                                                                         | 2 (0.0%)<br>(0.0% to 0.1%)       | 2 (0.1%)<br>(0.0% to 0.1%)       | 0                                     | 0                                |         |

**Table 4: Appropriateness of gifts and promotional funding from the pharmaceutical industry according to students. Each student was asked to assess whether they found it acceptable to receive each proposal.**

| Proposals<br>(n, % post-stratification, 99% CI)      | All<br>n = 5992                  | Clinical<br>students<br>n = 3333 | Primary care<br>residents<br>n = 1306 | Other residents<br>n = 1353     | P value          |
|------------------------------------------------------|----------------------------------|----------------------------------|---------------------------------------|---------------------------------|------------------|
| <b>Gift with lower value than €50</b>                |                                  |                                  |                                       |                                 | <i>&lt; .001</i> |
| Strongly disagree                                    | 2256 (36.9%)<br>(36.4% to 37.5%) | 1223 (36.3%)<br>(35.5% to 37.1%) | 590 (42.4%)<br>(41.3% to 43.4%)       | 443 (33.5%)<br>(32.6% to 34.4%) |                  |
| Disagree                                             | 1747 (29%)<br>(28.5% to 29.5%)   | 956 (28.3%)<br>(27.6% to 29.1%)  | 379 (29.9%)<br>(28.9% to 30.9%)       | 412 (29.1%)<br>(28.2% to 30.0%) |                  |
| Agree                                                | 1550 (26.6%)<br>(26.1% to 27.1%) | 907 (27.8%)<br>(27.0% to 28.5%)  | 281 (22.8%)<br>(21.9% to 23.8%)       | 362 (28%)<br>(27.2% to 28.9%)   |                  |
| Strongly agree                                       | 439 (7.5%)<br>(7.2% to 7.8%)     | 247 (7.6%)<br>(7.2% to 8.1%)     | 56 (4.9%)<br>(4.4% to 5.4%)           | 136 (9.3%)<br>(8.8% to 9.9%)    |                  |
| <b>Gift with higher value than €50</b>               |                                  |                                  |                                       |                                 | <i>&lt; .001</i> |
| Strongly disagree                                    | 3484 (57.8%)<br>(57.3% to 58.4%) | 1903 (57.2%)<br>(56.4% to 58.0%) | 887 (65.1%)<br>(64.0% to 66.1%)       | 694 (52.9%)<br>(51.9% to 53.9%) |                  |
| Disagree                                             | 1630 (27.7%)<br>(27.3% to 28.2%) | 926 (27.6%)<br>(26.9% to 28.4%)  | 301 (25.3%)<br>(24.4% to 26.3%)       | 403 (29.8%)<br>(28.9% to 30.7%) |                  |
| Agree                                                | 574 (9.2%)<br>(8.9% to 9.5%)     | 342 (10.1%)<br>(9.6% to 10.6%)   | 77 (5.9%)<br>(5.4% to 6.4%)           | 155 (10.6%)<br>(10.0% to 11.2%) |                  |
| Strongly agree                                       | 304 (5.2%)<br>(5.0% to 5.5%)     | 162 (5.1%)<br>(4.7% to 5.5%)     | 41 (3.7%)<br>(3.3% to 4.1%)           | 101 (6.7%)<br>(6.2% to 7.2%)    |                  |
| <b>Free meal</b>                                     |                                  |                                  |                                       |                                 | <i>&lt; .001</i> |
| Strongly disagree                                    | 1332 (21.1%)<br>(20.6% to 21.5%) | 743 (21.1%)<br>(20.4% to 21.8%)  | 402 (29.7%)<br>(28.7% to 30.7%)       | 187 (14.2%)<br>(13.5% to 14.9%) |                  |
| Disagree                                             | 1283 (20.9%)<br>(20.5% to 21.4%) | 711 (21.4%)<br>(20.7% to 22.1%)  | 317 (24.2%)<br>(23.3% - 25.2%)        | 255 (17.7%)<br>(17.0% to 18.4%) |                  |
| Agree                                                | 2392 (40.6%)<br>(40.0% to 41.1%) | 1349 (41.7%)<br>(40.9% to 42.6%) | 462 (36.1%)<br>(35.0% to 37.1%)       | 581 (42.6%)<br>(41.6% to 43.5%) |                  |
| Strongly agree                                       | 985 (17.5%)<br>(17.0% to 17.9%)  | 530 (15.8%)<br>(15.2% to 16.4%)  | 125 (10.1%)<br>(9.4% to 10.7%)        | 330 (25.5%)<br>(24.7% to 26.4%) |                  |
| <b>Funding to attend conferences or grand rounds</b> |                                  |                                  |                                       |                                 | <i>&lt; .001</i> |
| Strongly disagree                                    | 1213 (20%)<br>(19.6% to 20.5%)   | 629 (18.6%)<br>(18.0% to 19.3%)  | 418 (30.9%)<br>(29.9% to 31.9%)       | 166 (13.3%)<br>(12.6% to 14.0%) |                  |
| Disagree                                             | 969 (16.6%)<br>(16.2% to 17.1%)  | 517 (16.9%)<br>(16.3% to 17.5%)  | 287 (22.6%)<br>(21.7% to 23.5%)       | 165 (11.6%)<br>(11.0% to 12.3%) |                  |
| Agree                                                | 2348 (38.2%)<br>(37.6% to 38.7%) | 1369 (40%)<br>(39.2% to 40.9%)   | 429 (32.4%)<br>(31.4% to 33.5%)       | 550 (40.2%)<br>(39.3% to 41.2%) |                  |
| Strongly agree                                       | 1462 (25.1%)<br>(24.7% to 25.6%) | 818 (24.4%)<br>(23.7% to 25.1%)  | 172 (14.1%)<br>(13.3% to 14.9%)       | 472 (34.9%)<br>(33.9% to 35.8%) |                  |

| <b>Proposals</b><br>(n, % post-stratification, 99% CI) | <b>All</b><br>n = 5992           | <b>Clinical students</b><br>n = 3333 | <b>Primary care residents</b><br>n = 1306 | <b>Other residents</b><br>n = 1353 | <b>P value</b> |
|--------------------------------------------------------|----------------------------------|--------------------------------------|-------------------------------------------|------------------------------------|----------------|
| Free medical device                                    |                                  |                                      |                                           |                                    | < .001         |
| Strongly disagree                                      | 1463 (23.9%)<br>(23.4% to 24.3%) | 761 (22.6%)<br>(21.9% to 23.3%)      | 437 (31.9%)<br>(30.9% to 32.9%)           | 265 (19.3%)<br>(18.5% to 20.0%)    |                |
| Disagree                                               | 1298 (22.1%)<br>(21.6% to 22.5%) | 703 (21.3%)<br>(20.6% to 22.0%)      | 320 (25.0%)<br>(24.0% to 25.9%)           | 275 (20.8%)<br>(20.0% to 21.6%)    |                |
| Agree                                                  | 2305 (38.5%)<br>(37.9% to 39.0%) | 1351 (41%)<br>(40.2% to 41.9%)       | 421 (32.4%)<br>(31.4% to 33.4%)           | 533 (39.9%)<br>(38.9% to 40.8%)    |                |
| Strongly agree                                         | 926 (15.6%)<br>(15.2% to 16.0%)  | 518 (15%)<br>(14.4% to 15.7%)        | 128 (10.8%)<br>(10.1% to 11.4%)           | 280 (20.1%)<br>(19.3% to 20.9%)    |                |

**Table 5: Students' scepticism about the influence of pharmaceutical product promotion and incentives. Students were asked whether they agreed or disagreed with the proposals.**

| Proposals<br>(n, % post-stratification, 99% CI)                                           | Total<br>n = 5980                | Clinical<br>students<br>n = 3324 | Primary care<br>residents<br>n = 1304 | Other<br>residents<br>n = 1352  | P value |
|-------------------------------------------------------------------------------------------|----------------------------------|----------------------------------|---------------------------------------|---------------------------------|---------|
| Information provided by pharmaceutical representative is often interesting and educative. |                                  |                                  |                                       |                                 | < .001  |
| Strongly disagree                                                                         | 461 (7.8%)<br>(7.5% to 8.1%)     | 251 (7.6%)<br>(7.2% to 8.1%)     | 134 (10.7%)<br>(10.0% to 11.3%)       | 76 (5.7%)<br>(5.3% to 6.2%)     |         |
| Disagree                                                                                  | 2067 (34.2%)<br>(33.7% to 34.7%) | 1143 (34.4%)<br>(33.6% to 35.2%) | 505 (36.3%)<br>(35.2% to 37.3%)       | 419 (32.3%)<br>(31.4% to 33.2%) |         |
| Agree                                                                                     | 3298 (54.7%)<br>(54.2% to 55.3%) | 1868 (55.9%)<br>(55.0% to 56.7%) | 645 (50.8%)<br>(49.7% to 51.9%)       | 785 (56.4%)<br>(55.4% to 57.3%) |         |
| Strongly agree                                                                            | 160 (3.3%)<br>(3.1% to 3.5%)     | 67 (2.1%)<br>(1.8% to 2.3%)      | 21 (2.3%)<br>(2.0% to 2.6%)           | 72 (5.7%)<br>(5.2% to 6.1%)     |         |
| Information provided by pharmaceutical representative is useful to learn about new drugs. |                                  |                                  |                                       |                                 | < .001  |
| Strongly disagree                                                                         | 633 (10.4%)<br>(10.1% to 10.8%)  | 339 (9.7%)<br>(9.2% to 10.2%)    | 183 (14.1%)<br>(13.4% to 14.9%)       | 111 (8.4%)<br>(7.8% to 8.9%)    |         |
| Disagree                                                                                  | 1678 (28%)<br>(27.5% to 28.5%)   | 916 (27.5%)<br>(26.8% to 28.3%)  | 396 (29.0%)<br>(28.0% to 30.0%)       | 366 (27.8%)<br>(26.9% to 28.6%) |         |
| Agree                                                                                     | 3404 (56.9%)<br>(56.4% to 57.5%) | 1924 (58.2%)<br>(57.4% to 59.1%) | 697 (54.6%)<br>(53.5% to 55.7%)       | 783 (57%)<br>(56.0% to 57.9%)   |         |
| Strongly agree                                                                            | 271 (4.7%)<br>(4.5% to 4.9%)     | 150 (4.5%)<br>(4.1% to 4.8%)     | 29 (2.3%)<br>(2.0% to 2.7%)           | 92 (6.9%)<br>(6.4% to 7.4%)     |         |
| Receiving gifts or free meals makes me more likely to prescribe the company's drugs.      |                                  |                                  |                                       |                                 | < .001  |
| Strongly disagree                                                                         | 1821 (30.3%)<br>(29.8% to 30.8%) | 1015 (30.1%)<br>(29.3% to 30.9%) | 338 (26%)<br>(25.0% to 26.9%)         | 468 (34.1%)<br>(33.2% to 35.1%) |         |
| Disagree                                                                                  | 1966 (32.8%)<br>(32.3% to 33.4%) | 1067 (32.1%)<br>(31.3% to 32.8%) | 410 (30.9%)<br>(29.9% to 32.0%)       | 489 (35.4%)<br>(34.5% to 36.3%) |         |
| Agree                                                                                     | 1542 (26.3%)<br>(25.8% to 26.8%) | 873 (26.9%)<br>(26.2% to 27.7%)  | 365 (28%)<br>(27.1% to 29.0%)         | 304 (24.1%)<br>(23.2% to 24.9%) |         |
| Strongly agree                                                                            | 653 (10.5%)<br>(10.2% to 10.9%)  | 371 (11%)<br>(10.4% to 11.5%)    | 191 (15.1%)<br>(14.3% to 15.9%)       | 91 (6.4%)<br>(6.0% to 6.9%)     |         |
| Contacts between medical students and drug companies should be banned.                    |                                  |                                  |                                       |                                 | < .001  |
| Strongly disagree                                                                         | 1147 (19.5%)<br>(19.1% to 20.0%) | 562 (16.4%)<br>(15.8% to 17.0%)  | 213 (15.5%)<br>(14.7% to 16.3%)       | 372 (26.9%)<br>(26.1% to 27.8%) |         |
| Disagree                                                                                  | 2058 (35.2%)<br>(34.7% to 35.7%) | 1129 (33.9%)<br>(33.1% to 34.7%) | 389 (31.7%)<br>(30.7% to 32.7%)       | 540 (39.8%)<br>(38.8% to 40.7%) |         |
| Agree                                                                                     | 1582 (26.1%)<br>(25.6% to 26.6%) | 924 (28.6%)<br>(27.9% to 29.4%)  | 383 (29%)<br>(28.1% to 30.0%)         | 275 (20.3%)<br>(19.5% to 21.1%) |         |
| Strongly agree                                                                            | 1194 (19.2%)<br>(18.7% to 19.6%) | 710 (21.1%)<br>(20.4% to 21.8%)  | 319 (23.7%)<br>(22.8% to 24.7%)       | 165 (13%)<br>(12.4% to 13.7%)   |         |

| Proposals<br>(n, % post-stratification, 99% CI)                                                                                    | Total<br>n = 5980                | Clinical<br>students<br>n = 3324 | Primary care<br>residents<br>n = 1304 | Other<br>residents<br>n = 1352  | P value |
|------------------------------------------------------------------------------------------------------------------------------------|----------------------------------|----------------------------------|---------------------------------------|---------------------------------|---------|
| Information provided by drug companies is often biased.                                                                            |                                  |                                  |                                       |                                 | < .001  |
| Strongly disagree                                                                                                                  | 50 (0.7%)<br>(0.6% to 0.8%)      | 34 (0.9%)<br>(0.8% to 1.1%)      | 6 (0.2%)<br>(0.1% to 0.3%)            | 10 (0.8%)<br>(0.6% to 1.0%)     |         |
| Disagree                                                                                                                           | 473 (8.6%)<br>(8.3% to 8.9%)     | 228 (6.9%)<br>(6.5% to 7.3%)     | 93 (8.2%)<br>(7.6% to 8.8%)           | 152 (11.1%)<br>(10.5% to 11.8%) |         |
| Agree                                                                                                                              | 2777 (45.8%)<br>(45.2% to 46.3%) | 1570 (45.9%)<br>(45.1% to 46.7%) | 528 (39.2%)<br>(38.2% to 40.3%)       | 679 (50.7%)<br>(49.8% to 51.7%) |         |
| Strongly agree                                                                                                                     | 2681 (44.9%)<br>(44.4% to 45.5%) | 1493 (46.3%)<br>(45.4% to 47.1%) | 677 (52.3%)<br>(51.2% to 53.4%)       | 511 (37.4%)<br>(36.4% to 38.3%) |         |
| If other residents or physicians receive gifts or free meals, it makes them more likely to prescribe the company's drugs.          |                                  |                                  |                                       |                                 | < .001  |
| Strongly disagree                                                                                                                  | 568 (10.1%)<br>(9.8% to 10.5%)   | 291 (9.0%)<br>(8.6% to 9.5%)     | 88 (7.3%)<br>(6.7% to 7.9%)           | 189 (13.8%)<br>(13.2% to 14.5%) |         |
| Disagree                                                                                                                           | 2160 (36.2%)<br>(35.7% to 36.7%) | 1149 (33.8%)<br>(33.0% to 34.6%) | 416 (31.7%)<br>(30.7% to 32.8%)       | 595 (42.9%)<br>(42.0% to 43.9%) |         |
| Agree                                                                                                                              | 2344 (38.8%)<br>(38.3% to 39.4%) | 1365 (41.2%)<br>(40.3% to 42.0%) | 538 (41.1%)<br>(40.0% to 42.1%)       | 441 (34.0%)<br>(33.0% to 34.9%) |         |
| Strongly agree                                                                                                                     | 908 (14.8%)<br>(14.4% to 15.2%)  | 519 (16.0%)<br>(15.4% to 16.6%)  | 262 (19.9%)<br>(19.1% to 20.8%)       | 127 (9.3%)<br>(8.7% to 9.9%)    |         |
| Anyone giving a lecture to medical students should expose their conflict of interests with the pharmaceutical industry beforehand. |                                  |                                  |                                       |                                 | < .001  |
| Strongly disagree                                                                                                                  | 144 (2.3%)<br>(2.2% to 2.5%)     | 90 (2.6%)<br>(2.4% to 2.9%)      | 18 (1.6%)<br>(1.3% to 1.9%)           | 36 (2.5%)<br>(2.2% to 2.8%)     |         |
| Disagree                                                                                                                           | 397 (7.0%)<br>(6.7% to 7.3%)     | 222 (7.1%)<br>(6.6% to 7.5%)     | 73 (5.5%)<br>(5.0% to 6.0%)           | 102 (8.2%)<br>(7.7% to 8.7%)    |         |
| Agree                                                                                                                              | 1778 (29.5%)<br>(29.0% to 30.0%) | 970 (28.9%)<br>(28.1% to 29.7%)  | 360 (28.0%)<br>(27.0% to 29.0%)       | 448 (31.4%)<br>(30.5% to 32.3%) |         |
| Strongly agree                                                                                                                     | 3663 (61.2%)<br>(60.7% to 61.7%) | 2043 (61.4%)<br>(60.6% to 62.2%) | 854 (64.9%)<br>(63.9% to 66.0%)       | 766 (57.9%)<br>(57.0% to 58.9%) |         |

***Table 6: multivariate linear model of the cumulative exposure score. The names of the regions were recoded with letters to avoid inappropriate comparison between them (see discussion in the main text).***

| Effect                       | Estimation | Standard error | P value |
|------------------------------|------------|----------------|---------|
| <b>Intercept</b>             | 1.6932     | 0.2025         | < .001  |
| <b>Region</b>                |            |                | < .001  |
| A                            | -0.5864    | 0.2209         |         |
| B                            | -0.7410    | 0.3961         |         |
| C                            | -1.2861    | 0.2323         |         |
| D                            | -1.1962    | 0.2137         |         |
| E                            | -1.2482    | 0.2640         |         |
| F                            | -2.3819    | 0.2581         |         |
| G                            | -1.1362    | 0.3112         |         |
| H                            | -1.3756    | 0.1971         |         |
| I                            | -0.9721    | 0.2343         |         |
| J                            | -0.1837    | 0.2229         |         |
| K                            | -1.6248    | 0.2510         |         |
| L                            | -1.3765    | 0.5224         |         |
| M                            | -2.3017    | 0.2536         |         |
| N                            | reference  |                |         |
| <b>Year of study</b>         | 1.4793     | 0.02115        | < .001  |
| <b>Appropriateness score</b> | 0.3058     | 0.02592        | < .001  |

***Table 7: Comparison between 2012 (data source: Etain et al.<sup>1</sup>) and 2019 (current study) of students' exposure and opinions.***

| Situation or assertion                                                             | Clinical students | Residents     |
|------------------------------------------------------------------------------------|-------------------|---------------|
| <b>Meeting with a pharmaceutical representative (n, %)</b>                         |                   |               |
| <u>2012</u><br>Yes (raw, n = 1 405)                                                | 778 (79.4%)       | 627 (96.6%)   |
| <u>2019</u><br>Yes (post-stratification, n = 6 280)                                | 3 549 (71.0%)     | 2 731 (96.9%) |
| <b>Receiving of promotional gift (n, %)</b>                                        |                   |               |
| <u>2012</u><br>Yes (raw, n = 1 405)                                                | 778 (71.8%)       | 627 (89.9%)   |
| <u>2019</u><br>Yes (post-stratification, n = 6 280)                                | 3 549 (69.4%)     | 2 731 (74.9%) |
| <b>Receiving gifts or free meals could influence student' prescriptions (n, %)</b> |                   |               |
| <u>2012</u><br>Yes (raw, n = 1 405)                                                | 778 (2.0%)        | 627 (3.7%)    |
| <u>2019</u><br>Yes (post-stratification, n = 5 980)                                | 3 324 (37.4%)     | 2 656 (35.8%) |

<sup>1</sup> Etain B, Guittet L, Weiss N, Gajdos V, Katsahian S. Attitudes of Medical Students towards Conflict of Interest: A National Survey in France. PLOS ONE. 26 march 2014;9(3):e92858.

### Document 1: Questionnaire in French

#### **Caractéristiques socio-démographiques**

**Vous êtes : \***

Veillez sélectionner une seule des propositions suivantes : Une femme / Un homme

**Année de naissance : \***

Votre réponse doit être comprise entre 1960 et 2000

**Année ou semestre en cours** (veuillez indiquer votre année ou semestre actuel, si vous êtes en disponibilité ou en césure, veuillez indiquer la dernière année ou le dernier semestre validé) : \*

Veillez sélectionner une seule des propositions suivantes : DFASM 1/2/3 ou Interne semestre 1/2/3/4/5/6/7/8/9/10/11/12

#### **Quelle est votre faculté actuelle ? \* (Seulement proposée aux externes)**

Veillez sélectionner une seule des propositions suivantes : Aix-Marseille / Amiens / Angers / Antilles-Guyane / Besançon / Bordeaux / Brest / Caen / Clermont-Ferrand / Dijon / Grenoble / La Réunion / Lille 2 / Lille (Université Catholique) / Limoges / Lyon Sud / Lyon Est / Montpellier / Nancy / Nantes / Nice / Paris V Descartes / Paris VI UPMC / Paris VII Diderot / Paris XI KB / Paris XII Créteil / Paris XIII Bobigny / Paris Ouest / Poitiers / Reims / Rennes / Rouen / Saint-Etienne / Strasbourg / Toulouse Purpan / Toulouse Rangueil / Tours

#### **Quelle est votre faculté d'origine ? \* (si interne)**

Veillez sélectionner une seule des propositions suivantes : Aix-Marseille / Amiens / Angers / Antilles-Guyane / Besançon / Bordeaux / Brest / Caen / Clermont-Ferrand / Dijon / Grenoble / La Réunion / Lille 2 / Lille (Université Catholique) / Limoges / Lyon Sud / Lyon Est / Montpellier / Nancy / Nantes / Nice / Paris V Descartes / Paris VI UPMC / Paris VII Diderot / Paris XI KB / Paris XII Créteil / Paris XIII Bobigny / Paris Ouest / Poitiers / Reims / Rennes / Rouen / Saint-Etienne / Strasbourg / Toulouse Purpan / Toulouse Rangueil / Tours / Autre



**Quelle est votre ville d'internat ? \* (si interne)**

Veillez sélectionner une seule des propositions suivantes : Aix-Marseille / Amiens / Angers / Antilles-Guyane / Besançon / Bordeaux / Brest / Caen / Clermont-Ferrand / Dijon / Grenoble / La Réunion - Océan Indien / Lille / Limoges / Lyon / Montpellier / Nancy / Nantes / Nice / Paris / Poitiers / Reims / Rennes / Rouen / Saint-Etienne / Strasbourg / Toulouse / Tours

**Quelle est votre spécialité : \* (proposé si interne)**

Veillez sélectionner une seule des propositions suivantes : DES Allergologie / DES Anatomie et cytologie pathologiques / DES Anesthésie et réanimation / DES Biologie médicale / DES Dermatologie et vénéréologie / DES Endocrinologie, diabète, maladies métaboliques / DES Génétique médicale / DES Gériatrie / DES Gynécologie médicale / DES Hématologie / DES Hépto-gastro-entérologie / DES Maladies infectieuses et tropicales / DES Médecine cardiovasculaire / DES Médecine d'urgence / DES Médecine et Santé au travail / DES Médecine générale / DES Médecine intensive-réanimation / DES Médecine interne et immunologie clinique / DES Médecine légale et expertises médicales / DES Médecine nucléaire / DES Médecine physique et de réadaptation / DES Médecine vasculaire / DES Néphrologie / DES Neurologie / DES Oncologie / DES Pédiatrie / DES Pneumologie / DES Psychiatrie / DES Radiologie et imagerie médicale / DES Rhumatologie / DES Santé publique et médecine sociale / DES Chirurgie générale / DES Chirurgie maxillo faciale / DES Chirurgie orale / DES Chirurgie orthopédique et traumatologique / DES Chirurgie pédiatrique / DES Chirurgie plastique, reconstructrice et esthétique / DES Chirurgie thoracique et cardiovasculaire / DES Chirurgie vasculaire / DES Chirurgie viscérale et digestive / DES Gynécologie obstétrique / DES Neurochirurgie / DES Ophtalmologie / DES Oto-rhino-laryngologie et chirurgie cervico-faciale / DES Stomatologie / DES Urologie / DES Gériatrie / DES Médecine d'urgence / DES Nutrition / DES Maladies infectieuses

**Concernant vos relations avec l'industrie pharmaceutique :**

Depuis le début de votre cursus, avez-vous déjà reçu ou participé à : \*

Choisissez la réponse appropriée pour chaque élément :

|                                                                                                                                      | Jamais | Entre 1 et 5 fois | Entre 6 et 10 fois | Plus de 10 fois |
|--------------------------------------------------------------------------------------------------------------------------------------|--------|-------------------|--------------------|-----------------|
| <b>Discussion avec un visiteur médical :</b>                                                                                         |        |                   |                    |                 |
| <b>Et dans les 6 derniers mois ?</b>                                                                                                 |        |                   |                    |                 |
| <b>Cadeau publicitaire "non médical" de faible valeur : stylo, matériel de bureau, carnet de note, gadget publicitaire, autre...</b> |        |                   |                    |                 |
| <b>Et dans les 6 derniers mois ?</b>                                                                                                 |        |                   |                    |                 |
| <b>Matériel médical (réglette ECG, marteau réflexe, stéthoscope, ...) offert par un laboratoire pharmaceutique :</b>                 |        |                   |                    |                 |
| <b>Et dans les 6 derniers mois ?</b>                                                                                                 |        |                   |                    |                 |
| <b>Remise d'une fiche de présentation d'un médicament par un visiteur médical :</b>                                                  |        |                   |                    |                 |
| <b>Et dans les 6 derniers mois ?</b>                                                                                                 |        |                   |                    |                 |
| <b>Repas offert par un laboratoire pharmaceutique :</b>                                                                              |        |                   |                    |                 |
| <b>Et dans les 6 derniers mois ?</b>                                                                                                 |        |                   |                    |                 |
| <b>Soirée ou séminaire de formation sponsorisé par un laboratoire pharmaceutique :</b>                                               |        |                   |                    |                 |
| <b>Et dans les 6 derniers mois ?</b>                                                                                                 |        |                   |                    |                 |
| <b>Remboursement de frais de congrès par un laboratoire pharmaceutique (inscription, voyage, hôtel) :</b>                            |        |                   |                    |                 |
| <b>Et dans les 6 derniers mois ?</b>                                                                                                 |        |                   |                    |                 |
| <b>Abonnement à une revue médicale offert par un laboratoire pharmaceutique :</b>                                                    |        |                   |                    |                 |
| <b>Et dans les 6 derniers mois ?</b>                                                                                                 |        |                   |                    |                 |
| <b>Remise d'un échantillon gratuit de médicament par un laboratoire pharmaceutique :</b>                                             |        |                   |                    |                 |
| <b>Et dans les 6 derniers mois ?</b>                                                                                                 |        |                   |                    |                 |

**Selon vous...**

Trouvez-vous approprié qu'un médecin reçoive de la part de l'industrie pharmaceutique : \*

Choisissez la réponse appropriée pour chaque élément :

|                                                         | <b>Complètement<br/>d'accord</b> | <b>Plutôt d'accord</b> | <b>Plutôt pas d'accord</b> | <b>Pas du tout<br/>d'accord</b> |
|---------------------------------------------------------|----------------------------------|------------------------|----------------------------|---------------------------------|
| <b>Un cadeau de faible valeur (moins de 50 euros) ?</b> |                                  |                        |                            |                                 |
| <b>Un cadeau d'une valeur de plus de 50 euros ?</b>     |                                  |                        |                            |                                 |
| <b>Un repas gratuit ?</b>                               |                                  |                        |                            |                                 |
| <b>Un remboursement de frais de congrès/séminaire ?</b> |                                  |                        |                            |                                 |
| <b>Du matériel médical ?</b>                            |                                  |                        |                            |                                 |

Que pensez-vous des propositions suivantes : \*

Choisissez la réponse appropriée pour chaque élément :

|                                                                                                                                                                         | <b>Complètement<br/>d'accord</b> | <b>Plutôt d'accord</b> | <b>Plutôt pas d'accord</b> | <b>Pas du tout<br/>d'accord</b> |
|-------------------------------------------------------------------------------------------------------------------------------------------------------------------------|----------------------------------|------------------------|----------------------------|---------------------------------|
| <b>La plupart des informations fournies par les représentants de l'industrie sont intéressantes et formatrices.</b>                                                     |                                  |                        |                            |                                 |
| <b>Les informations des visiteurs médicaux sont utiles pour se former sur les nouvelles thérapeutiques.</b>                                                             |                                  |                        |                            |                                 |
| <b>Recevoir des cadeaux ou participer à un repas offert par un laboratoire augmente les chances que je prescrive le médicament de ce laboratoire.</b>                   |                                  |                        |                            |                                 |
| <b>Les contacts entre l'industrie pharmaceutique et les étudiants en médecine devraient être interdits.</b>                                                             |                                  |                        |                            |                                 |
| <b>Les informations fournies par l'industrie pharmaceutique sont souvent biaisées en faveur du médicament ou du produit du laboratoire en question.</b>                 |                                  |                        |                            |                                 |
| <b>Recevoir des cadeaux ou participer à un repas offert par un laboratoire augmente les chances que d'autres collègues prescrivent le médicament de ce laboratoire.</b> |                                  |                        |                            |                                 |
| <b>Toute personne effectuant une présentation devant des étudiants de médecine à la faculté devrait énoncer ses liens d'intérêt avec l'industrie avant son cours.</b>   |                                  |                        |                            |                                 |

**Concernant la formation à la critique de la promotion pharmaceutique :**

Avez-vous déjà bénéficié lors de votre formation initiale (avant l'internat) d'une formation sur les relations médecins-industrie pharmaceutique et/ou sur la promotion pharmaceutique? \* (proposé si interne)

Veillez sélectionner une seule des propositions suivantes : oui / non

Avez-vous déjà bénéficié à la faculté d'une formation sur les relations médecins-industrie pharmaceutique et/ou sur la promotion pharmaceutique? \*

Veillez sélectionner une seule des propositions suivantes : oui/non

**Cette formation était-elle obligatoire dans votre cursus ? \***

Veillez sélectionner une seule des propositions suivantes : oui/non

**Vous estimez-vous suffisamment formé(e) pour gérer vos relations avec l'industrie pharmaceutique? \***

Veillez sélectionner une seule des propositions suivantes : Oui, tout à fait / Oui, plutôt / Non, pas vraiment / Non, pas du tout

**Souhaiteriez-vous plus de cours à la faculté sur la notion de conflit d'intérêt, et sur la critique de la promotion pharmaceutique ? \***

Veillez sélectionner une seule des propositions suivantes : Oui, tout à fait / Oui, plutôt / Non, pas vraiment / Non, pas du tout

**Pensez-vous avoir le droit de recevoir seul un représentant de l'industrie pharmaceutique ? \***

Veillez sélectionner une seule des propositions suivantes : oui / non / ne sait pas

### **Dernière étape : sur le plan institutionnel**

**La fréquence de vos contacts avec les délégués médicaux dépend le plus souvent de (plusieurs réponses possibles) : \***

Veillez choisir toutes les réponses qui conviennent :

- Votre volonté ou non de discuter avec eux
- Des habitudes ou de l'organisation du service ou de votre maître de stage
- Du risque d'être jugé par vos maîtres de stage ou vos collègues
- De votre emploi du temps
- De la gentillesse et la générosité des délégué(e)s médica(-les)ux
- De la qualité de leurs prestations passées
- Autre

**Précisez : \* (si autre)**

**Durant votre cursus, vos formateurs, vos médecins seniors ou vos maîtres de stages reçoivent-ils des visiteurs médicaux en votre présence : \***

Veillez sélectionner une seule des propositions suivantes : Jamais / Une fois par mois / Une fois par semaine / Plusieurs fois par semaine

**Durant votre cursus, vos formateurs, vos médecins seniors ou vos maîtres de stages vous ont-ils encouragé à participer à des rencontres (rendez-vous, staffs, repas...) avec des représentants de laboratoires pharmaceutiques ? \***

Veillez sélectionner une seule des propositions suivantes : Jamais / Rarement / Assez souvent / Souvent

**En dehors de vos cours (faculté ou DES), vos médecins seniors, ou vos maîtres de stage, vous ont-ils procuré des conseils pour vous former à la critique de la promotion pharmaceutique ? \***

Veillez sélectionner une seule des propositions suivantes : Jamais / Rarement / Assez souvent / Souvent

**Existe-t-il, à votre connaissance, une politique stricte qui encadre les interactions entre étudiants en médecine et industrie pharmaceutique dans votre faculté et/ou de votre CHU ? \***

Veillez sélectionner une seule des propositions suivantes : oui/non

**Avez-vous connaissance de la Charte éthique et déontologique rédigée en 2017 par la Conférence des doyens de médecine et d'odontologie? \***

Veillez sélectionner une seule des propositions suivantes : oui/non
